# Supplementary material for: Antenna array-enhanced attenuated total reflection IR analysis in an aqueous solution
Source: Royal Society of Chemistry journal article supplement (doi:10.1039/c9nr04032c), 2019-01-01
Supplement: c9nr04032c1.pdf [file c9nr04032c1.pdf]

## **Antenna array enhanced attenuated total reflection IR analysis in aqueous solution**

Jian Li<sup>a</sup>, Zhendong Yan<sup>b</sup>, Jin Li<sup>a</sup>, Zhenlin Wang<sup>c</sup>, William Morrison<sup>d</sup>, Xing-Hua Xia<sup>a\*</sup>

*<sup>a</sup>State Key Laboratory of Analytical Chemistry for Life Science, School of Chemistry and Chemical Engineering, Nanjing University, Nanjing 210023, China*

*<sup>b</sup>College of Science, Nanjing Forestry University, Nanjing 210037, China*

*<sup>c</sup>School of Physics, Nanjing University, Nanjing, 210093, China*

*<sup>d</sup>Molecular Vista Inc., 6840 Via Del Oro, Suite 110, San Jose, CA 95119, USA.*

*\*Correspondence: xhxia@nju.edu.cn*

Table of contents

S1. Water induced antenna resonance shift on Si and Al<sub>2</sub>O<sub>3</sub>.

S2. Details of simulations.

S1. Water induced antenna resonance shift on Si and Al<sub>2</sub>O<sub>3</sub>

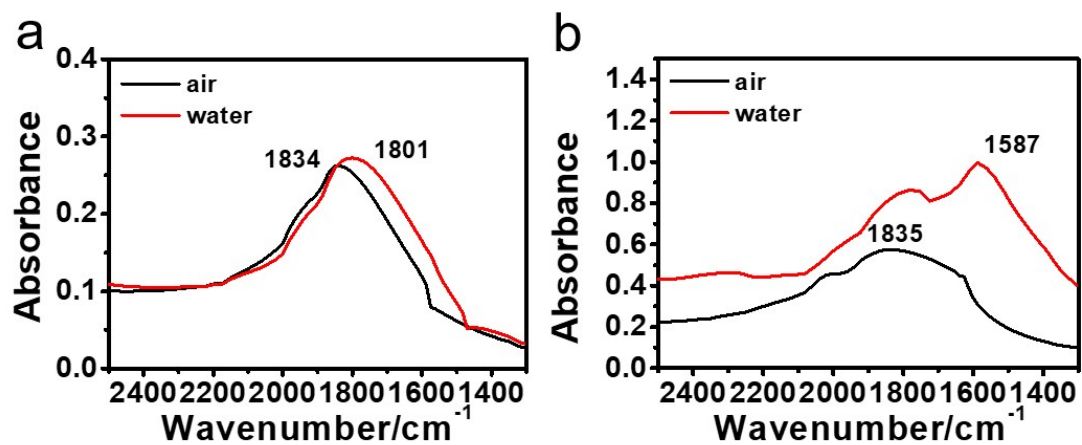

**Figure S1.** Simulated resonance spectra of the antenna arrays on Si (a) and Al<sub>2</sub>O<sub>3</sub> prisms (b) in air and water with p-polarization, respectively.

## S2. Details of simulations

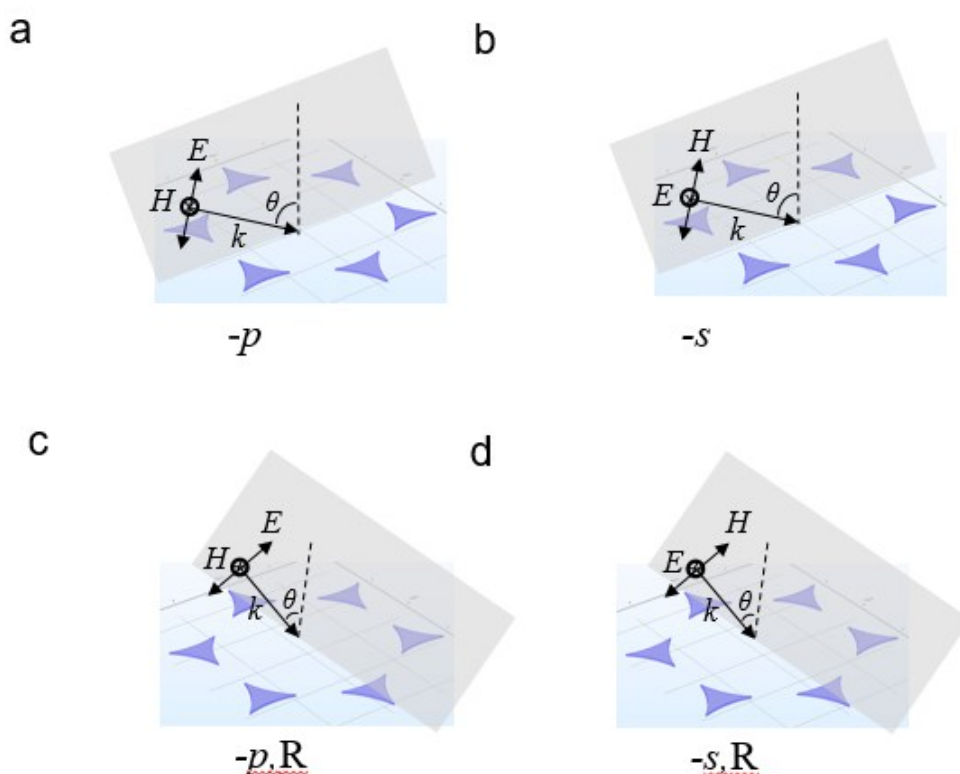

Figure S2. Scheme of the numerical models used in simulations. The simulation parameter of incident angle ( $\theta=70^\circ$ ) in ATR mode is the same as in experiments. (a) The incident light polarization ( $E$ ) is in the incident plane ( $p$ -polarization,  $-p$ ). (b)  $E$  is in the incident plane perpendicular to the incident plane ( $s$ -polarization,  $-s$ ). (c)  $E$  polarization in (a) is  $30^\circ$  or  $90^\circ$  rotated as indicated ( $-p, R$ ). (d)  $E$  polarization in (b) is  $30^\circ$  or  $90^\circ$  rotated as indicated ( $-s, R$ ).

In the present study, numerical simulations are performed using a commercial finite element method (FEM)-based software package (COMSOL Multiphysics). The refractive index of Si prism and water is taken as 3.4 and 1.33, respectively. The permittivity of gold is described by a Lorenz-Drude model.<sup>1</sup> Periodic boundary conditions are applied to the four faces (parallel to the propagation direction) of a simulation domain, mimicking the antenna array shown in Figure 2(c).

### Reference

1. A.D. Rakic, A.B. Djurišić, J. M. Elazar and M.L. Majewski. *Appl. Opt.*, 1998, **37**, 5271–5283.
